# Supplementary material for: Virological outcome among HIV infected patients transferred from pediatric care to adult units in Madrid, Spain (1997–2017)
Source: PubMed Central journal article supplement (PMC7547007; doi:10.1038/s41598-020-70861-x), 2020-10-09
Supplement: 41598_2020_70861_MOESM1_ESM.pdf [file 41598_2020_70861_MOESM1_ESM.pdf]

## **SUPPLEMENTARY MATERIAL**

- Supplementary Table S1. HIV-1 non-B variants characterized by phylogenetic analysis of *pol* sequences in the study Madrid Cohort of HIV-1 infected children and adolescents.
- Supplementary Table S2. Trends in ADR prevalence in pretreated non-transferred and transferred youths in the Madrid Cohort of HIV-1 infected children and adolescents (2011 vs. 2017).
- Supplementary Fig. S1. Predicted susceptibility level to antiretroviral drugs in pretreated patients from the Madrid Cohort of HIV-1 infected children and adolescents.

**Supplementary Table S1. HIV-1 non-B variants characterized by phylogenetic analysis of *pol* sequences in the study Madrid Cohort of HIV-1 infected children and adolescents.**

| Cohort                          | GeneBank Access number                              | Available sequence | HIV-1 variant | Infection route | Place of birth (Patient) | Father origin | Mother origin |
|---------------------------------|-----------------------------------------------------|--------------------|---------------|-----------------|--------------------------|---------------|---------------|
| Non-transferred patients (N=24) | MT085808                                            | PR+RT              | A             | Unknkown        | EQ                       | -             | -             |
|                                 | JQ351963                                            | PR+RT              | A6            | Perinatal       | Spain                    | Bulgaria      | Ukraine       |
|                                 | JQ351964                                            | PR+RT              | C             | Perinatal       | Mozambique               | -             | -             |
|                                 | JQ351994                                            | PR+RT              | C             | Perinatal       | Morocco                  | -             | -             |
|                                 | HQ426895                                            | PR+RT              | C             | Perinatal       | Spain                    | Cameroon      | Spain         |
|                                 | KX607065                                            | PR+RT              | CRF11_cpx     | Perinatal       | Spain                    | EQ            | EQ            |
|                                 | KX607074                                            | PR+RT              | CRF_012BF     | Perinatal       | Spain                    | Spain         | Paraguay      |
|                                 | MT085809                                            | PR+RT              | CRF01_AE      | Sexual          | Bolivia                  | -             | -             |
|                                 | genotypic resistance profile available <sup>a</sup> |                    | CRF01_AE      | Perinatal       | EQ                       | -             | -             |
|                                 | JQ351975                                            | PR+RT              | CRF02_AG      | Perinatal       | Spain                    | EQ            | Spain         |
|                                 | MT085810                                            | PR+RT              | CRF02_AG      | Perinatal       | Nigeria                  | -             | -             |
|                                 | JQ352008                                            | PR+RT              | CRF02_AG      | Perinatal       | Spain                    | Cameroon      | Cameroon      |
|                                 | KX607071                                            | PR+RT              | CRF02_AG      | Perinatal       | Nigeria                  | -             | -             |
|                                 | KX607072                                            | PR+RT              | CRF02_AG      | Perinatal       | EQ                       | -             | -             |
|                                 | HQ426906                                            | PR+RT              | CRF02_AG      | Perinatal       | EQ                       | -             | -             |
|                                 | MT085811                                            | PR+RT              | CRF63_2A      | Perinatal       | Spain                    | Nigeria       | EQ            |
|                                 | HQ426905                                            | PR+RT              | CRF02_AG      | Perinatal       | EQ                       | -             | -             |
|                                 | JQ351971                                            | PR+RT              | CRF02_AG      | Perinatal       | Spain                    | EQ            | EQ            |
|                                 | JQ351953                                            | PR+RT              | CRF13_cpx     | Transfusion     | EQ                       | -             | -             |
|                                 | HQ426911                                            | PR+RT              | CRF13_cpx     | Perinatal       | India                    | -             | -             |
|                                 | MT085812                                            | PR+RT              | CRF45_cpx     | Perinatal       | EQ                       | -             | -             |
|                                 | KX607062                                            | PR+RT              | F1            | Perinatal       | Spain                    | Romania       | Romania       |
|                                 | MT085813                                            | PR+RT              | CRF43_02G     | Perinatal       | Nigeria                  | -             | -             |
|                                 | KX607078                                            | PR+RT              | URF con G     | Unknkown        | EQ                       | -             | -             |
| Transferred youths (N=9)        | genotypic resistance profile available <sup>a</sup> |                    | A             | Sexual          | Spain                    | Spain         | Spain         |
|                                 | HQ426893                                            | PR+RT              | A2            | Perinatal       | Spain                    | Spain         | Spain         |
|                                 | MT085814                                            | PR+RT              | CRF01_AE      | Sexual          | Spain                    | Spain         | Spain         |
|                                 | HQ426903                                            | PR+RT              | CRF02_AG      | Perinatal       | Spain                    | Spain         | Morocco       |
|                                 | HQ426910                                            | PR+RT              | CRF12_BF      | Perinatal       | Spain                    | Spain         | Spain         |
|                                 | HQ426759                                            | PR+RT              | CRF28_BF      | Perinatal       | Spain                    | Spain         | Spain         |
|                                 | JQ351962                                            | PR+RT              | URF with G    | Perinatal       | Nigeria                  | -             | -             |
|                                 | HQ426900                                            | PR+RT              | H             | Perinatal       | Cameroon                 | -             | -             |
|                                 | MT085815                                            | PR+RT              | URF with B    | Sexual          | Dominican Republic       | -             | -             |

PR, protease; RT, reverse-transcriptase; dash, not available data; EQ, Equatorial Guinea.

In 1 children and 1 transferred with no available *pol* sequence, HIV-1 variant information was available in clinical report.

<sup>a</sup>Genotypic resistance profile: no available sequence.

**Supplementary Table S2. Trends in ADR prevalence in pretreated non-transferred and transferred youths in the Madrid Cohort of HIV-1 infected children and adolescents (2011 vs. 2017).**

| ADRM                      | Pretreated Non-transferred patients. No. (%) |                           |                   | Pretreated transferred youths No. (%) |                            |               |
|---------------------------|----------------------------------------------|---------------------------|-------------------|---------------------------------------|----------------------------|---------------|
|                           | 2011 <sup>a</sup><br>n=131                   | 2017 <sup>b</sup><br>n=50 | p value           | 2011 <sup>a</sup><br>n=58             | 2017 <sup>b</sup><br>n=117 | p value       |
| <b>To any drug family</b> | 91 (69.5)                                    | 22 (44)                   | <b>0.0016</b>     | 47 (81)                               | 84 (71.8)                  | 0.1848        |
| <b>To NRTI</b>            | 81 (62.1)                                    | 14 (28)                   | <b>&lt;0.0001</b> | 45 (76.9)                             | 75 (64.1)                  | 0.0705        |
| <b>To NNRTI</b>           | 53 (40.5)                                    | 10 (20)                   | <b>0.0098</b>     | 21 (36.5)                             | 33 (28.2)                  | 0.2807        |
| <b>To PI</b>              | 48 (36.8)                                    | 6 (44)                    | <b>0.0012</b>     | 30 (50.9)                             | 32 (27.4)                  | <b>0.0015</b> |
| <b>To NRTI+NNRTI</b>      | 16 (12.2)                                    | 1 (2.0)                   | <b>0.0352</b>     | 7 (12.1)                              | 14 (10.3)                  | 0.9842        |
| <b>To NRTI+PI</b>         | 11 (8.4)                                     | 1 (2.0)                   | 0.1219            | 11 (19.0)                             | 11 (9.4)                   | 0.0724        |
| <b>To NNRTI+PI</b>        | 1 (0.8)                                      | 0                         | 0.5356            | 0                                     | 0                          |               |
| <b>To NRTI+NNRTI+PI</b>   | 23 (17.6)                                    | 3 (6.0)                   | <b>0.0474</b>     | 10 (17.2)                             | 15 (12.8)                  | 0.4314        |

No., number of patients. Significant (p<0.05).

<sup>a</sup>Previous study: Mulder *et al*, 2012<sup>13</sup>; <sup>b</sup> Present study.

**Supplementary Fig. S1. Predicted susceptibility level to antiretroviral drugs in pretreated patients from the Madrid Cohort of HIV-1 infected children and adolescents.**

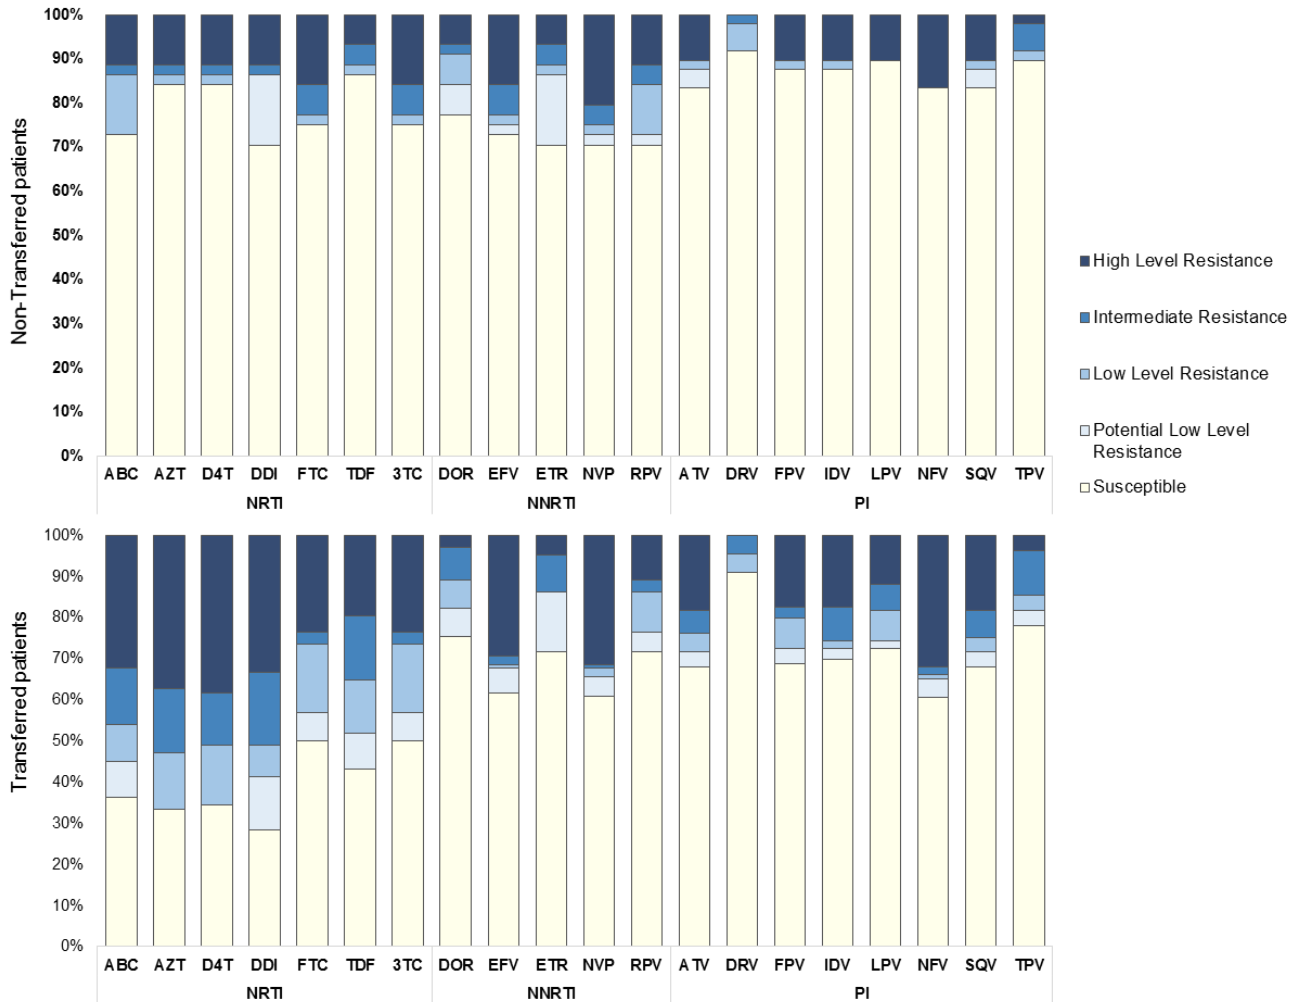

Susceptibility level was estimated according to Stanford HIVdb Interpretation Algorithm.

ABC, abacavir; AZT, zidovudine; d4T, stavudine; ddi, didanosine; FTC, emtricitabine; TDF, tenofovir disoproxil fumarate; 3TC, lamivudine; DOR, doravirine; EFV, efavirenz; ETR, etravirine; NVP, nevirapine; RPV, rilpivirine; ATV, atazanavir; DRV, darunavir; FPV, fosamprenavir; IDV, indinavir; LPV, lopinavir; NFV, nelfinavir; SQV, saquinavir; TPV, tipranavir; NRTI, nucleoside reverse-transcriptase inhibitor; NNRTI, non-nucleoside reverse-transcriptase inhibitor; PI, protease inhibitor.

Results were calculated in 48 PR and 44 RT sequences from non-transferred patients and in 109 PR and 102 RT sequences from transferred individuals at sampling.
